# Supplementary material for: Characteristics promoting behaviour change: physician experience with a coalition-led quality improvement initiative to reduce excessive laboratory test ordering
Source: PubMed Central journal article supplement — BMJ Open Qual. 2023 Jan 10;12(1):e001965. doi: 10.1136/bmjoq-2022-001965 (PMC9835945; doi:10.1136/bmjoq-2022-001965), 2023-01-10
Supplement: bmjoq-2022-001965supp001.pdf [file bmjoq-2022-001965supp001.pdf]

## A Qualitative Analysis of a Coalition's Characteristics that Influence Physician Behavior

### Supplemental File A- Interview Guide Part 1 and Part 2

#### Interview Guide Part 1

| <b>Demographics</b>                                                                                                                                                          |                                                                                                                                        |
|------------------------------------------------------------------------------------------------------------------------------------------------------------------------------|----------------------------------------------------------------------------------------------------------------------------------------|
| 1. Years of clinical practice experience                                                                                                                                     | <input type="checkbox"/> <10 years<br><input type="checkbox"/> 10-19 years<br><input type="checkbox"/> 20 plus years                   |
| 2. Years of formal administrative/leadership experience:                                                                                                                     | <input type="checkbox"/> <10 years<br><input type="checkbox"/> 10-19 years<br><input type="checkbox"/> 20 plus years                   |
| 3. What is your formal position or leadership role/title:                                                                                                                    |                                                                                                                                        |
| <b>Organizational and Change Management</b>                                                                                                                                  |                                                                                                                                        |
|                                                                                                                                                                              | <i>Not at all Familiar</i> <i>Somewhat Familiar</i> <i>Familiar</i> <i>Very Familiar</i>                                               |
| 1. How familiar are you that a physician QI leadership coalition called the SCIC was developed to focus on health system improvement including QI knowledge and application? | <input type="checkbox"/> 1 <input type="checkbox"/> 2 <input type="checkbox"/> 3 <input type="checkbox"/> 4                            |
| 2. How familiar are you that lab test ordering overuse (LTOO) and urea (BUN) utilization was an issue in Alberta?                                                            | <input type="checkbox"/> 1 <input type="checkbox"/> 2 <input type="checkbox"/> 3 <input type="checkbox"/> 4                            |
| <b>QI Knowledge and Application</b>                                                                                                                                          |                                                                                                                                        |
|                                                                                                                                                                              | <i>Novice Not at all</i> <i>Beginner</i> <i>Competent</i> <i>Proficient</i> <i>Expert</i>                                              |
| 3. <b>Prior</b> to implementing the LTOO QI Project:                                                                                                                         |                                                                                                                                        |
| a. How would you rate your QI knowledge and application?                                                                                                                     | <input type="checkbox"/> 1 <input type="checkbox"/> 2 <input type="checkbox"/> 3 <input type="checkbox"/> 4 <input type="checkbox"/> 5 |
| b. How would you rate your QI leadership experience?                                                                                                                         | <input type="checkbox"/> 1 <input type="checkbox"/> 2 <input type="checkbox"/> 3 <input type="checkbox"/> 4 <input type="checkbox"/> 5 |
| 4. <b>Post</b> implementing the LTOO QI Project/initiative:                                                                                                                  |                                                                                                                                        |
| a. How would you rate your QI knowledge and application?                                                                                                                     | <input type="checkbox"/> 1 <input type="checkbox"/> 2 <input type="checkbox"/> 3 <input type="checkbox"/> 4 <input type="checkbox"/> 5 |
| b. How would you rate your QI leadership experience?                                                                                                                         | <input type="checkbox"/> 1 <input type="checkbox"/> 2 <input type="checkbox"/> 3 <input type="checkbox"/> 4 <input type="checkbox"/> 5 |
| <b>Role of Coalition Related to QI Knowledge</b>                                                                                                                             |                                                                                                                                        |
|                                                                                                                                                                              | <i>Strongly Disagree</i> <i>Disagree</i> <i>Neutral</i> <i>Agree</i> <i>Strongly agree</i>                                             |
| 5. Do you think the coalition supported your QI knowledge and application?                                                                                                   | <input type="checkbox"/> 1 <input type="checkbox"/> 2 <input type="checkbox"/> 3 <input type="checkbox"/> 4 <input type="checkbox"/> 5 |
| If agree- How did the coalition support your QI knowledge?                                                                                                                   |                                                                                                                                        |
| If disagree or neutral-Can you elaborate?                                                                                                                                    |                                                                                                                                        |

## Interview Guide Part 2-Semi-Structured Interview Guide Using TDF Framework \*Definitions and constructs: Cane et al. 2012

| COM-B Component            | TDF Domains                           | TDF Definitions* and Theoretical constructs represented within each domain*                                                                                                                                                                                                                     | Questions/Prompts                                                                                                                                                                                                                                                                                                                                                                                                                                                                                                                                                                                                                                                                                   |
|----------------------------|---------------------------------------|-------------------------------------------------------------------------------------------------------------------------------------------------------------------------------------------------------------------------------------------------------------------------------------------------|-----------------------------------------------------------------------------------------------------------------------------------------------------------------------------------------------------------------------------------------------------------------------------------------------------------------------------------------------------------------------------------------------------------------------------------------------------------------------------------------------------------------------------------------------------------------------------------------------------------------------------------------------------------------------------------------------------|
| Psychological capability   | Knowledge                             | An awareness of the existence of something. (Knowledge including knowledge of condition/scientific rationale. Procedural knowledge. Knowledge of task environment.)                                                                                                                             | <b><u>Create a sense of urgency:</u></b><br>1. Did the coalition have a role in increasing your awareness or sense of urgency about the issues of lab test over ordering, more specifically urea –blood test over ordering?<br>2. What are your thoughts about a coalition-comprised of speciality physicians working <b>together on specific</b> health system issues?                                                                                                                                                                                                                                                                                                                             |
| <b>Physical capability</b> | Skills                                | An ability or proficiency acquired through practice. ( <b>Skills, Skill development</b> , Competence, <b>Ability</b> , Interpersonal skills, Practice, and Skill assessment)                                                                                                                    | See Part 1                                                                                                                                                                                                                                                                                                                                                                                                                                                                                                                                                                                                                                                                                          |
|                            | Social professional role and identity | A coherent set of behaviors and displayed personal qualities of an individual in a social or work setting. ( <b>Professional identity, Professional role</b> Social identity, Professional boundaries Professional confidence, Group identity <b>Leadership and Organizational commitment</b> ) | <b><u>Physician QI Leadership role and identity:</u></b><br>3. Have you taken on a QI leadership role or position in the past?<br>> If yes, can you share briefly what your role and responsibilities were<br>> If no, why not?<br>3a. What barriers and supports are there for physician regarding QI participation or leadership?<br>3b. What barriers and supports are there regarding resource stewardship QI projects/initiatives like LTOO?<br>4. Did the coalition contribute to your organizational physician QI role or QI commitments?<br>Yes/No, If No-move to next question<br>If yes, what aspects of the coalition had the greatest impact on your leadership role or QI commitments? |
|                            | Beliefs about capabilities            | Acceptance of the truth, reality, or validity about an ability, talent, or facility that a person can put to constructive use. ( <b>Self-confidence</b> , Perceived competence Self-efficacy, Perceived behavioral control Beliefs, Self-esteem, Empowerment and Professional confidence)       | 5. How confident were you about participating in the LTOO QI project?<br>5a. How confident were you about leading the LTOO QI project?<br>5b. What supported your confidence?                                                                                                                                                                                                                                                                                                                                                                                                                                                                                                                       |
|                            | Beliefs about consequences            | Acceptance of the truth, reality, or validity about outcomes of a behaviour in a given situation. (Beliefs, Outcome expectancies Characteristics of outcome expectancies Anticipated regret and Consequences)                                                                                   | <b><u>Strategic management:</u></b><br>6. Did the coalition assist in your understanding of the strategic priority, vision, expectations and consequences related to this QI project?                                                                                                                                                                                                                                                                                                                                                                                                                                                                                                               |

|                                 |                                          |                                                                                                                                                                                                                                                                                                                                                                                                         |                                                                                                                                                                                                                                                                                                                                                                                                                                                                                                                                                                                                                                                                                |
|---------------------------------|------------------------------------------|---------------------------------------------------------------------------------------------------------------------------------------------------------------------------------------------------------------------------------------------------------------------------------------------------------------------------------------------------------------------------------------------------------|--------------------------------------------------------------------------------------------------------------------------------------------------------------------------------------------------------------------------------------------------------------------------------------------------------------------------------------------------------------------------------------------------------------------------------------------------------------------------------------------------------------------------------------------------------------------------------------------------------------------------------------------------------------------------------|
|                                 | Goals                                    | Goals (distal/proximal)<br>Goal priority<br><b>Goal/target setting</b><br>Goals (autonomous/controlled)<br><b>Action planning</b>                                                                                                                                                                                                                                                                       | <b><u>Generate short term wins-LTOO initiative goal:</u></b><br>7. Did the coalition assist with strategic action planning and goal setting?<br>8. What impact did the following have on the monthly urea utilization rate? (decrease, increase or stayed the same)<br><ul style="list-style-type: none"> <li>➢ Influential physician leaders (coalition leader, region leader, QI physician team leader)</li> <li>➢ Intervention components</li> </ul> 9. Do you think physician order behaviour changed regarding urea blood testing?<br><ul style="list-style-type: none"> <li>➢ If Yes, What do you perceive was the reason (s) for the change?</li> </ul> If No, why not? |
| Reflective motivation           | Intention                                | A conscious decision to perform a behavior or resolve to act in a certain way.<br>Mental representations of outcomes or end states that an individual wants to achieve.<br>(Stability of intentions<br>Stages of change model<br><b>Trans-theoretical model and stages of change, and implementation intention)</b>                                                                                     | <b><u>Enlist an Army:</u></b><br>10. Did the awareness of the coalition influence your participation and QI project intervention implementation?<br>10a. How important was your awareness that both the coalition leader, region leader and the medicine executive director supported the LTOO QI project regarding your QI participation and leadership?<br>10b. Did the intervention components and QI approach impact your motivation for participating, leading and implementing the changes?                                                                                                                                                                              |
| <b>Psychological capability</b> | Memory, attention and decision processes | The ability to retain information, focus selectively on aspects of the environment and choose between two or more alternatives. (Memory, Attention, Attention control<br><b>Decision making, Cognitive overload/tiredness)</b>                                                                                                                                                                          |                                                                                                                                                                                                                                                                                                                                                                                                                                                                                                                                                                                                                                                                                |
| Physical opportunity            | Environmental context and resources      | Any circumstance of a person's situation or <b>environment that discourages or encourages</b> the development of skills and abilities, independence, social competence, and adaptive behavior.<br>(Environmental stressors<br>Resources/material resources<br>Organizational culture/climate<br>Salient events/critical incidents Person x environment interaction<br><b>Barriers and facilitators)</b> | <b><u>Environmental barriers and facilitators:</u></b><br>11. Do you think that any of the following had an influence or not on whether you participated/lead this QI project:<br><ul style="list-style-type: none"> <li>➢ COVID 19</li> <li>➢ Choosing wisely campaign</li> <li>➢ Hospital IT system implementation</li> <li>➢ Health organization or government priorities</li> <li>➢ Daily clinical priorities</li> <li>➢ Anything else?</li> </ul>                                                                                                                                                                                                                         |
| <b>Social opportunity</b>       | Social influences                        | Those interpersonal processes that can cause individuals to change their thoughts, feelings, or behaviors.<br><b>(Social pressure, Social norms, Group conformity, Social comparisons, Group norms, Social support, Power, Intergroup conflict, Alienation, Group identity)</b>                                                                                                                         | <b><u>Coalition Influential Physician Leader:</u></b><br><b><u>Leader bases of power:</u></b><br>12. Did the coalition physician leader have an impact on your decision to participate, lead and implement the QI project interventions?<br><b><u>Political Influence tactics:</u></b><br>13. Were there any specific actions, or communications by physician leaders (coalition or region leader) that may have affected your decision to participate or lead this QI                                                                                                                                                                                                         |

|                        |                                                                                                                                                                                                                                                                     |                                                                                                                                                                                                                                                                                                                                                                                                                                                                                                                                                                                    |
|------------------------|---------------------------------------------------------------------------------------------------------------------------------------------------------------------------------------------------------------------------------------------------------------------|------------------------------------------------------------------------------------------------------------------------------------------------------------------------------------------------------------------------------------------------------------------------------------------------------------------------------------------------------------------------------------------------------------------------------------------------------------------------------------------------------------------------------------------------------------------------------------|
|                        | Modeling)<br><i>Social and Group norms: {Opinion leaders represent the social norms within the network and others trust them to compare innovations with the exiting norms and demands of the local situation}</i>                                                  | project/initiative?<br>14. Reflecting back, what were the key characteristics that supported your decision for QI participation and leadership of this QI project?                                                                                                                                                                                                                                                                                                                                                                                                                 |
| Emotion                | A complex reaction pattern, involving experiential, behavioural, and psychological elements, by which an individual attempts to deal with a personally significant matter or event. (Fear, Anxiety, Affect, Stress, Depression, positive /negative effect Burn-out) |                                                                                                                                                                                                                                                                                                                                                                                                                                                                                                                                                                                    |
| Behavioural regulation | Anything aimed at managing or changing objectively observed or measured actions. (Self-monitoring, Breaking habit, Action planning)                                                                                                                                 |                                                                                                                                                                                                                                                                                                                                                                                                                                                                                                                                                                                    |
| Optimism               | The confidence that things will happen for the best or that desired goals will be attained. (Pessimism Unrealistic optimism Identity)                                                                                                                               |                                                                                                                                                                                                                                                                                                                                                                                                                                                                                                                                                                                    |
| Reinforcement          | Increasing the probability of a response by arranging a dependent relationship, or contingency, between the response and a given stimulus (Incentives, Punishment, Consequents, Reinforcement, Contingencies, Sanctions)                                            | 15. How effective do you think the coalition was at facilitating the spread of this QI project?<br>16a. Do you think coalition impacts physician QI leadership culture?<br>16b. Would you participate in QI projects supported by coalition in the future? If yes, can you elaborate and If no, why not<br>16c. In the future, do you think using a similar physician QI leadership approach (coalition) is appropriate for physician involvement in QI activities?<br>17. What else should be done to encourage and support physician QI participation/ leadership in the future? |
