# Supplementary material for: Characteristics promoting behaviour change: physician experience with a coalition-led quality improvement initiative to reduce excessive laboratory test ordering
Source: PubMed Central journal article supplement — BMJ Open Qual. 2023 Jan 10;12(1):e001965. doi: 10.1136/bmjoq-2022-001965 (PMC9835945; doi:10.1136/bmjoq-2022-001965), 2023-01-10
Supplement: bmjoq-2022-001965supp002.pdf [file bmjoq-2022-001965supp002.pdf]

## A Qualitative Analysis of a Coalition's Characteristics that Influence Physician Behavior

### Supplemental File B

Overarching Themes, Relevant TDF Domains, Domain themes, Illustrative Quotes, COM-B constructs and Linked Intervention Functions

| Overarching Theme                                                            | TDF domains                           | Domain themes                                                                                                                                                     | Examples of interview quotes                                                                                                                                                                                                                                                                                                             | COM-B Construct            | Linked intervention functions               |
|------------------------------------------------------------------------------|---------------------------------------|-------------------------------------------------------------------------------------------------------------------------------------------------------------------|------------------------------------------------------------------------------------------------------------------------------------------------------------------------------------------------------------------------------------------------------------------------------------------------------------------------------------------|----------------------------|---------------------------------------------|
| <b>1. QI education and hands-on opportunities supports involvement*</b>      | Knowledge                             | 1. Coalition provided QI education and training encourages physician-led QI<br><br>2. LTOO project provides a experiential (hands-on) QI opportunity              | “Provided QI workshop with the methodology and the science of improvement that was helpful” (P3)<br><br>“Knowledge and just knowing how to, how to be involved with the QI project” (P8)                                                                                                                                                 | Capability (Psychological) | Education<br>Training<br>Enablement         |
|                                                                              | Skills                                | 3. Past hands on QI training and involvement encourages future physician QI involvement                                                                           | “I think having had some formal knowledge of QI processes [helped]” (P7)<br>“I had some experience with both QI and lab overuse when I was a medical resident” (P5)                                                                                                                                                                      | Capability (Physical)      | Training<br>Enablement                      |
|                                                                              | Beliefs about capabilities            | 4. QI is a new skillset for physicians which impacts confidence                                                                                                   | “I feel very beginner and newbie in terms of QI, its foreign and isn't a concept that is well ingrained” (P1)                                                                                                                                                                                                                            | Motivation (Reflective)    | Persuasion<br>Enablement                    |
| <b>2. Physician mentorship*</b>                                              | Social influences                     | 5. Physician QI mentorship                                                                                                                                        | “Providing a mentor, or that type of relationship would really help” (P11)<br>“The biggest bang for the buck is mentorship” (P9)                                                                                                                                                                                                         | Opportunity (Social)       | Modeling<br>Enablement<br>Incentivisation   |
|                                                                              | Social professional role and identity | 6. Shepard (chaperone) Physician QI leadership role and provide opportunity to lead<br>7. Physician champion does not view themselves as leading the LTOO project | “In the past we were asked to participate, today, they are asked to lead” (P2)<br>“Shepherd physician-led QI projects” (P10)<br>“Allowed me to lead and establish my physician QI role” (P5)<br>“Knowing somebody else was running it was great” (P1)<br>“Co-leadership role” (P10)                                                      | Motivation (reflection)    | Incentivisation<br>Persuasion<br>Enablement |
| <b>3. Coalition functions as a safe peer-to-peer QI community*</b>           | Knowledge                             | 8. “It is a think tank where physicians can discuss QI topics”                                                                                                    | “Bring a problem to the table and brainstorm ways to address and then scale and spread” (P7)                                                                                                                                                                                                                                             | Capability (psychological) | Education<br>Persuasion                     |
|                                                                              | Social influences                     | 9. Coalition (SCIC) provides a forum for QI collaboration                                                                                                         | “Beneficial for any site, program or group of physicians looking to engage in QI and create QI as a priority within their culture, integrate physicians into the QI frameworks and organization” (P2)                                                                                                                                    | Opportunities (social)     | Enablement<br>Modelling                     |
| <b>4. Trusted local physician leader sharing QI encourages involvement**</b> | Social influences                     | 10. “Put a physician leader face” on the LTOO project<br>11. Coalition physician members spreading and championing the QI project                                 | “Simple straight forward project led by a trusted, high quality physician, who I know is going to lead the project, moving it forward.” (P11)<br>“The coalition physician leader was an influence” (P4)<br>“I just think it is nice that it's from a physician leader perspective, who shares the QI issues and how they solved it” (P6) | Opportunity (Social)       | Modelling<br>Enablement                     |

|                                                                     |                                       |                                                                                                                                                                                                                                                                               |                                                                                                                                                                                                                                                                                                                  |                              |                                                        |
|---------------------------------------------------------------------|---------------------------------------|-------------------------------------------------------------------------------------------------------------------------------------------------------------------------------------------------------------------------------------------------------------------------------|------------------------------------------------------------------------------------------------------------------------------------------------------------------------------------------------------------------------------------------------------------------------------------------------------------------|------------------------------|--------------------------------------------------------|
| <b>5. Provide initiative approach, data and physician role**</b>    | Knowledge                             | 12. Coalition presentation improved LTOO awareness (utilization and cost data)                                                                                                                                                                                                | “Made reasonable sense, seemed logical and well laid out during the presentation” (P8)<br>“Rarely, do we ever actually get presented with the numbers,... probably one of the most helpful things” (P10)<br>“Access to information, not only the what but the how its provided” (P12)                            | Capabilities (Psychological) | Education<br>Restrictions<br>Training<br>Persuasion    |
|                                                                     | Social influences                     | 13.QI recognition                                                                                                                                                                                                                                                             | “The credibility with QI involvement for these physician-led projects adds value to the project in the eyes of other physicians” (P2)                                                                                                                                                                            | Opportunity (social)         | Education<br>Persuasion<br>Incentives                  |
|                                                                     |                                       | 14.QI sharing (social comparison) to encourage QI                                                                                                                                                                                                                             | “ I think having a proof of concept showed in the presentation is excellent because it just provides reassurance that , yeah, they did this, okay we can do this here” (P11)                                                                                                                                     |                              |                                                        |
|                                                                     | Goals                                 | 15.Project goals and benefits were clear and that lab ordering is a patient safety and financial issue                                                                                                                                                                        | “It is just simple, anyone can understand the goals and for that reason, I think that helped this QI project get traction” (P11)<br>“Seeing how much we spend in urea blood testing is alarming” (P6)                                                                                                            | Motivation (Reflective)      | Modelling-                                             |
|                                                                     | Beliefs about consequences            | 16.Anticipated positive intervention implementation effect (reduced urea ordering)                                                                                                                                                                                            | “This is one of those ones that is pretty clean; everyone sees it as a pretty good idea” (P10)                                                                                                                                                                                                                   | Motivation (Reflective)      | Persuasion                                             |
|                                                                     | Intentions                            | 17.Meet physicians where they are at with a change idea/concept, share the why to motivate grassroots physicians to improve order behaviour                                                                                                                                   | “I think the most importantly, of rolling it out to my team, who are very change resistant, was having a really strong evidence of the Why.” (P1)                                                                                                                                                                | Motivation (Reflective)      | Enablement                                             |
|                                                                     | Social professional role and identity | 18.LTOO Project aligned to Health organization priorities with support from medical and organizational leaders                                                                                                                                                                | “Project was recognized as a strategic priority provided more credence to the work, further knowing it was Choosing Wisely funding also showed that there was professional and organizational priority” (P5)                                                                                                     | Motivation (Reflective)      | Environmental restructuring                            |
| <b>6. Order BUN tests mindfully not reflexively or habitually**</b> | Beliefs about capabilities            | 19.Lab test ordering is a learnt and ingrained practice                                                                                                                                                                                                                       | “It’s an ingrained [learnt], auto practice; the more physicians are in practice and develop a routine and almost a habit” (P1).                                                                                                                                                                                  | Motivation (reflective)      | Restrictions<br>Education<br>Modelling                 |
|                                                                     | Behavioral regulation                 | 20.Transition from reflexive/habitual ordering to mindful (evidence-based, patient required) ordering                                                                                                                                                                         | “Reflexive and not really thinking about it” (P8)<br>“I now think about it instead of automatically just running down the list” (P1)                                                                                                                                                                             | Capability (psychological)   | Education<br>Incentivisation<br>Persuasion<br>Training |
|                                                                     |                                       | 21.Sustain physician order behaviour change through data reflection and integration in medical learner curriculum<br>“Remove the root cause” by removing choice (urea blood test) from paper and IT order forms<br>22.ConnectCare (IT system) standardizes the lab order sets | “Support ongoing reflection and data collection”(P1)<br>“Education will need to become integrated into learner curriculum”(P2)<br>“Biggest difference when we get urea off the order set” (P10)<br>“The most effective thing is really just changing the form and the buy in from the grassroots physicians”(P3) |                              |                                                        |
|                                                                     |                                       | “The order set changes can support a smoother implementation for both                                                                                                                                                                                                         | n/a-confounder                                                                                                                                                                                                                                                                                                   | n/a-confounder               |                                                        |

|                                                                                                               |                                     |                                                                                                                                                                                           |                                                                                                                                                                                                                                                                                                               |                            |                                                      |
|---------------------------------------------------------------------------------------------------------------|-------------------------------------|-------------------------------------------------------------------------------------------------------------------------------------------------------------------------------------------|---------------------------------------------------------------------------------------------------------------------------------------------------------------------------------------------------------------------------------------------------------------------------------------------------------------|----------------------------|------------------------------------------------------|
|                                                                                                               |                                     | and the urea blood test has been removed                                                                                                                                                  | Connect Care and the project" (P2)                                                                                                                                                                                                                                                                            |                            |                                                      |
|                                                                                                               | Social influences                   | 23.Urea lab test ordering physician conformity                                                                                                                                            | "Physicians are educating their learners about the urea test change and why" (P2)<br>"Physicians still come up to me, oh, I was just thinking about urea testing" (P7)                                                                                                                                        | Opportunity (social)       | Modelling<br>Training<br>Incentivisation<br>coercion |
| <b>7.Changing physician behaviour is difficult**</b>                                                          | Optimism                            | 24.Pessimistic-"Tough to change physician behaviour"                                                                                                                                      | "Have to drag along the rest of the group" (P10)<br>"I think the barrier would be in general physician behaviour" (P8)                                                                                                                                                                                        | Motivation (Reflective)    | Enablement                                           |
|                                                                                                               | Beliefs about consequences          | 25.Perceived threat to physician choice and freedom-" being told what to do"                                                                                                              | "Creates that ivory tower sort of feeling, when you're just being told what to do and you're like that's never going to apply here" (P7)<br>"Don't want things imposed on them" (P12)                                                                                                                         | Motivation (Reflective)    | Coercion                                             |
|                                                                                                               | Environmental context and resources | 26.Hospital culture differs                                                                                                                                                               | "Implementation of things that worked in another site may not necessarily going to work at a different site" and "One needs to remember that not all places are the same" (P7)                                                                                                                                | Opportunity (physical)     | Modelling                                            |
| <b>8. Opportunity to lead, with support, a straightforward QI intervention that requires minimal effort *</b> | Environmental context and resources | 27.Minimal Physician project effort, straightforward intervention with minimal workflow impact<br>28.Provide continual access to experienced support personnel to assist physician-led QI | "Actual change component to the work flow was very minimal, didn't create a bunch of extra time for physicians" (P1)<br><br>"It's the person to assist to get it done, the sharing of abilities and expertise, it's awesome" (P10)<br>"The shared QI consultant has been excellent with moving forward" (P11) | Capability (psychological) | Enablement<br>Training                               |
|                                                                                                               | Beliefs about capabilities          | 29.Simple Intervention increased confidence to lead QI implementation                                                                                                                     | "It wasn't taxing for me supported my participation"<br>"Time commitment for me was little. If it had been something that required a lot more of me at that time, I wouldn't have been as engaged"                                                                                                            | Motivation<br>Reflection   | Persuasion<br>Enablement<br>Education                |
|                                                                                                               | Emotion                             | 30.QI project experience was positive, targeted a grassroots annoying problem, with minimal physician QI effort, motivating physician participation                                       | "This has been a positive experience" (P12)<br>"The thoughts and feeling with the project were more that it was grassroots on the ward"(P6)                                                                                                                                                                   | Motivation (automatic)     | Persuasion (modelling, training, enablement)         |
| <b>9.Physician-led QI competed out due to clinical demands*</b>                                               | Environmental context and resources | 31.Physician staffing challenges                                                                                                                                                          | "Its been historically harder to get physicians, chronically understaffed and regularly the emergency department are closing for weekends because they don't have physician coverage" (P7)                                                                                                                    | Opportunity (physical)     | Modelling<br>Training-service provision              |
|                                                                                                               |                                     | 32.Covid-19/Pandemic reduced physician time to champion any additional tasks such as QI                                                                                                   | "Expanding the project has been challenging as everyone is extremely tasked with managing patients and they're being redeployed to do something else during the pandemic" (P3)                                                                                                                                | n/a-confounder             | n/a-confounder                                       |
|                                                                                                               |                                     | 33.Connect Care-IT system rollout/ implementation is a competing priority that reduces physician time to participate in                                                                   | "Covid always been in the back of everyone's sort of collective minds, it just meant less time for everything else and lots of physicians were like, I just can't keep up with this anymore"(P7)<br>"Now physicians are like, how do I get through my 12 hour shift with a completely new EMR" (P7)           | n/a-confounder             | n/a-confounder                                       |

|                                       |                                                                                  |                                                                                                                                                                                                                                                                                                                               |                         |                                                |
|---------------------------------------|----------------------------------------------------------------------------------|-------------------------------------------------------------------------------------------------------------------------------------------------------------------------------------------------------------------------------------------------------------------------------------------------------------------------------|-------------------------|------------------------------------------------|
|                                       | QI activities                                                                    | “Now we can’t even get locums for the province, because they don’t know how to use Connect Care” (P7)                                                                                                                                                                                                                         |                         |                                                |
| Social professional role and identity | 34.Competing demands-<br>“Juggling clinical demands”                             | “Physicians don’t have the time to seek the knowledge of QI but also to carry out a project when you’re on busy clinical service”(P3)<br>“When I’m on shift, I am only there to look after patients and can’t attend meetings. I can’t do any other project work while I’m there because of the nature of the work we do”(P1) | Motivation (reflection) | Persuasion<br>Incentivisation<br>Coercion      |
| Beliefs about consequences            | 35.Physician-led QI was competed out                                             | “ If there isn’t time, funding or resources QI is being left out” (P5)<br>“There is not an appetite for those things right now”(P7)                                                                                                                                                                                           | Motivation (reflection) | Persuasion<br>Incentivisation                  |
| Emotion                               | 36.Physicians emotional well-being is impacting their ability to engage in QI    | “Trying to provide knowledge or practice change to a group of people who are sort of overworked, trying to sort of balance and survive in their existence” (P7)                                                                                                                                                               | Motivation (automatic)  | Persuasion                                     |
| Reinforcement                         | 37. No incentives for physician QI involvement (funding/grants and remuneration) | “You’re never going to get anyone to do anything if they are not remunerated” (P7)<br>“They do not remunerate physicians” (P11)<br>“We don’t get paid any extra income for doing this”(P12)                                                                                                                                   | Motivation (automatic)  | Incentivisation<br>Environmental restructuring |

Note. LTOO=Laboratory Test Ordering Overuse, COM-B=Capability, Opportunity and Motivation Behavior, \*-Themes aligned to QI leadership and participation behaviour, and \*\* - Themes aligned to BUN ordering behaviour
